# Supplementary material for: The Roles of Immune Memory and Aging in Protective Immunity and Endogenous Reactivation of Tuberculosis
Source: PubMed Central journal article supplement (PMC3620273; doi:10.1371/journal.pone.0060425), 2013-04-08
Supplement: pone.0060425.s001.pdf [file pone.0060425.s001.pdf]

## Supporting Information

### The roles of immune memory and aging in protective immunity and endogenous reactivation of tuberculosis

Giorgio Guzzetta<sup>1,2,\*</sup>, Denise Kirschner<sup>3</sup>

1 Department of Statistics and Mathematics Applied to Economics, University of Pisa, Italy

2 Fondazione Bruno Kessler, Trento, Italy

3 Department of Microbiology and Immunology, University of Michigan Medical School, USA \* E-mail: guzzetta@fbk.eu

## S1 Equations and compartmental scheme of the reference model

Hereafter we report the Ordinary Differential Equations for the reference model of acute immune response [1] on which the present work builds, with each contributing term shortly defined on the right side. Additional information on biological support for the specific functional form of each can be found in the original paper [1]. A graphical summary of these dynamics for cellular populations are represented in Figure S1.

|                     |                                                                                                                                                                                                                                                                                                                                                                                     |                                                                                                                                                                                                                                                               |
|---------------------|-------------------------------------------------------------------------------------------------------------------------------------------------------------------------------------------------------------------------------------------------------------------------------------------------------------------------------------------------------------------------------------|---------------------------------------------------------------------------------------------------------------------------------------------------------------------------------------------------------------------------------------------------------------|
| $\frac{dM_R}{dt} =$ | $+Sr_m$ $+\alpha_{4a}(M_A + w_2M_I)$ $+Sr_{4b} \frac{F_\alpha}{F_\alpha + f_8 I_{10} + s_{4b}}$ $-k_2 M_R \frac{BE}{BE + c_9}$ $-k_3 M_R \frac{BE + wBI + \beta F_\alpha}{BE + wBI + \beta F_\alpha + c_8} \frac{I_\gamma}{I_\gamma + f_1 I_4 + s_1}$ $-\nu_{MR} M_R$                                                                                                               | <p><b>RESTING MACROPHAGES <math>M_R</math></b></p> <p>Background recruitment</p> <p>Macrophage recruitment</p> <p>TNF-<math>\alpha</math> recruitment</p> <p>Infection (to <math>M_I</math>)</p> <p>Activation (to <math>M_A</math>)</p> <p>Natural death</p> |
| $\frac{dM_I}{dt} =$ | $+k_2 M_R \frac{BE}{BE + c_9}$ $-k_{17} M_I \frac{BI^2}{BI^2 + N^2 MI^2}$ $-k_{14a} M_I \frac{\frac{M_I}{T_C + w_3 T_{h1}}}{\frac{M_I}{M_I} + c_4}$ $-k_{14b} M_I \frac{\frac{F_\alpha}{F_\alpha + f_9 I_{10} + s_{4b}}}{\frac{T_C T_{h1} + c_{T1} + w_1 T_{h1}}{M_I}}$ $-k_{52} M_I \frac{\frac{M_I}{T_C T_{h1} + c_{T1} + w_1 T_{h1}}}{\frac{M_I}{M_I} + c_{52}}$ $-\nu_{MI} M_I$ | <p><b>INFECTED MACROPHAGES <math>M_I</math></b></p> <p>Infection (from <math>M_R</math>)</p> <p>Bursting</p> <p>T cell induced apoptosis</p> <p>TNF-<math>\alpha</math> induced apoptosis</p> <p>Cytotoxic killing by T cells</p> <p>Natural death</p>        |
| $\frac{dM_A}{dt} =$ | $+k_3 M_R \frac{BE + wBI + \beta F_\alpha}{BE + wBI + \beta F_\alpha + c_8} \frac{I_\gamma}{I_\gamma + f_1 I_4 + s_1}$ $-k_4 M_A \frac{I_{10}}{I_{10} + s_8}$ $-\nu_{MA} M_A$                                                                                                                                                                                                       | <p><b>ACTIVATED MACROPHAGES <math>M_A</math></b></p> <p>Activation (from <math>M_R</math>)</p> <p>Deactivation</p> <p>Natural death</p>                                                                                                                       |

|                      |   |                                                                                                                                                                                                                                                                                                |                                                                                                                                                                                                                                                                                |
|----------------------|---|------------------------------------------------------------------------------------------------------------------------------------------------------------------------------------------------------------------------------------------------------------------------------------------------|--------------------------------------------------------------------------------------------------------------------------------------------------------------------------------------------------------------------------------------------------------------------------------|
| $\frac{dT_0}{dt}$    | = | $ \begin{aligned} & +\alpha_{1a}(M_A + w_2M_I) \\ & +Sr_{1b}\frac{F_\alpha}{F_\alpha+f_8I_{10}+s_{4b2}} \\ & +\alpha_2T_0\frac{M_A}{M_A+c_{15}} \\ & -k_6I_{12}T_0\frac{I_\gamma}{I_\gamma+f_1I_4+f_7I_{10}+s_1} \\ & -k_7T_0\frac{I_A}{I_4+f_2I_\gamma+s_2} \\ & -\nu_{T0}T_0 \end{aligned} $ | <p><b>INDIFFERENTIATED CD4 T CELLS <math>T_0</math></b></p> <p>Macrophage recruitment</p> <p>TNF-<math>\alpha</math> recruitment</p> <p>Proliferation</p> <p>Differentiation (to <math>T_{h1}</math>)</p> <p>Differentiation (to <math>T_{h2}</math>)</p> <p>Natural death</p> |
| $\frac{dT_{h1}}{dt}$ | = | $ \begin{aligned} & +\alpha_{3a}(M_A + w_2M_I) \\ & +Sr_{3b}\frac{F_\alpha}{F_\alpha+f_8I_{10}+s_{4b1}} \\ & +k_6I_{12}T_0\frac{I_\gamma}{I_\gamma+f_1I_4+f_7I_{10}+s_1} \\ & -\nu_{Tg}\frac{I_\gamma}{I_\gamma+c}T_{h1}M_A \\ & -\nu_{T1}T_{h1} \end{aligned} $                               | <p><b>T-HELPER TYPE 1 CD4+ CELLS <math>T_{h1}</math></b></p> <p>Macrophage recruitment</p> <p>TNF-<math>\alpha</math> recruitment</p> <p>Differentiation (from <math>T_0</math>)</p> <p>IFN-<math>\gamma</math> apoptosis</p> <p>Natural death</p>                             |
| $\frac{dT_{h2}}{dt}$ | = | $ \begin{aligned} & +\alpha_{3a2}(M_A + w_2M_I) \\ & +Sr_{3b2}\frac{F_\alpha}{F_\alpha+f_8I_{10}+s_{4b1}} \\ & +k_7T_0\frac{I_A}{I_4+f_2I_\gamma+s_2} \\ & -\nu_{T2}T_{h2} \end{aligned} $                                                                                                     | <p><b>T-HELPER TYPE 2 CD4+ CELLS <math>T_{h2}</math></b></p> <p>Macrophage recruitment</p> <p>TNF-<math>\alpha</math> recruitment</p> <p>Differentiation (from <math>T_0</math>)</p> <p>Natural death</p>                                                                      |
| $\frac{dT_{80}}{dt}$ | = | $ \begin{aligned} & +\alpha_{1a}(M_A + w_2M_I) \\ & +Sr_{1b}\frac{F_\alpha}{F_\alpha+f_8I_{10}+s_{4b2}} \\ & +\alpha_2T_{80}\frac{M_A}{M_A+c_{15}} \\ & -k_6I_{12}T_{80}\frac{I_\gamma}{I_\gamma+f_1I_4+f_7I_{10}+s_1} \\ & -\nu_{T0}T_{80} \end{aligned} $                                    | <p><b>INDIFFERENTIATED CD8 T CELLS <math>T_{80}</math></b></p> <p>Macrophage recruitment</p> <p>TNF-<math>\alpha</math> recruitment</p> <p>Proliferation</p> <p>Differentiation (to <math>T_C</math> and <math>T_8</math>)</p> <p>Natural death</p>                            |
| $\frac{dT_C}{dt}$    | = | $ \begin{aligned} & +m\alpha_{3ac}(M_A + w_2M_I) \\ & +mSr_{3bc}\frac{F_\alpha}{F_\alpha+f_8I_{10}+s_{4b1}} \\ & +mk_6I_{12}T_{80}\frac{I_\gamma}{I_\gamma+f_1I_4+f_7I_{10}+s_1} \\ & -\nu_{TCg}\frac{I_\gamma}{I_\gamma+c}T_C M_A \\ & -\nu_{TC}T_C \end{aligned} $                           | <p><b>CD8+ T CELLS WITH CYTOTOXIC FUNCTION <math>T_C</math></b></p> <p>Macrophage recruitment</p> <p>TNF-<math>\alpha</math> recruitment</p> <p>Differentiation (from <math>T_{80}</math>)</p> <p>IFN-<math>\gamma</math> apoptosis</p> <p>Natural death</p>                   |
| $\frac{dT_8}{dt}$    | = | $ \begin{aligned} & +m\alpha_{3ac}(M_A + w_2M_I) \\ & +mSr_{3bc}\frac{F_\alpha}{F_\alpha+f_8I_{10}+s_{4b1}} \\ & +mk_6I_{12}T_{80}\frac{I_\gamma}{I_\gamma+f_1I_4+f_7I_{10}+s_1} \\ & -\nu_{TCg}\frac{I_\gamma}{I_\gamma+c}T_8 M_A \\ & -\nu_{TC}T_8 \end{aligned} $                           | <p><b>CD8+ T CELLS <math>T_8</math></b></p> <p>Macrophages recruitment</p> <p>TNF-<math>\alpha</math> recruitment</p> <p>Differentiation (from <math>T_{80}</math>)</p> <p>IFN-<math>\gamma</math> apoptosis</p> <p>Natural death</p>                                          |

$$\begin{aligned} \frac{dBE}{dt} = & +\alpha_{20}BE \\ & +k_{17}NM_I \frac{BI^2}{BI^2+N^2M_I^2} \\ & +k_{14a}NN_{fracc}M_I \frac{\frac{T_C+w_3T_{h1}}{M_I}}{T_C+w_3T_{h1}} \\ & +k_{14b}NN_{fraca}M_I \frac{\frac{F_\alpha}{M_I+c_4}}{F_\alpha+f_9I_{10}+s_{4b}} \\ & -k_2 \frac{N}{2} M_R \frac{BE}{BE+c_9} \\ & -k_{15}M_A BE - k_{18}M_R BE \\ & -n_E BE \end{aligned}$$

**EXTRACELLULAR BACTERIA  $BE$** 

Bacterial replication

Bursting of  $M_I$  (from  $BI$ )T cell induced apoptosis of  $M_I$  (from  $BI$ )TNF- $\alpha$  induced apoptosis of  $M_I$  (from  $BI$ )Internalization by  $M_R$  (to  $BI$ )

Killing by macrophages

Natural death

$$\begin{aligned} \frac{dBI}{dt} = & +\alpha_{19}BI \left(1 - \frac{BI^2}{BI^2+N^2M_I^2}\right) \\ & +k_2 \frac{N}{2} M_R \frac{BE}{BE+c_9} \\ & -k_{17}NM_I \frac{BI^2}{BI^2+N^2M_I^2} \\ & -k_{14a}NM_I \frac{\frac{M_I}{T_C+w_3T_{h1}}}{M_I+c_4} \\ & -k_{14b}NM_I \frac{\frac{F_\alpha}{F_\alpha+f_9I_{10}+s_{4b}}}{T_C \frac{T_{h1}}{T_{h1}+c_{T1}} + w_1 T_{h1}} \\ & -k_{52}NM_I \frac{\frac{M_I}{T_C \frac{T_{h1}}{T_{h1}+c_{T1}} + w_1 T_{h1}}}{M_I+c_{52}} \\ & -n_I BI \end{aligned}$$

**INTRACELLULAR BACTERIA  $BI$** 

Bacterial replication

Internalization by  $M_R$  (from  $BE$ )Bursting of  $M_I$  (to  $BE$ )T cell induced apoptosis of  $M_I$  (partially to  $BE$ )TNF- $\alpha$  induced apoptosis of  $M_I$  (partially to  $BE$ )Cytotoxic killing of  $M_I$  by T cells

Natural death

$$\begin{aligned}
\frac{dI_\gamma}{dt} &= && \text{INTERFERON-}\gamma \ I_\gamma \\
&+ s_9 \frac{BE+wBI}{BE+wBI+c_{10}} \frac{I_{12}}{I_{12}+s_7} && \text{Dendritic cells production} \\
&+ \alpha_{5a} T_{h1} \frac{M_A}{M_A+c_{5a}} && T_{h1} \text{ production} \\
&+ \alpha_7 T_0 \frac{I_{12}}{I_{12}+f_4 I_{10}+s_4} && T_0 \text{ production} \\
&+ \alpha_7 T_{80} \frac{I_{12}}{I_{12}+f_4 I_{10}+s_4} && T_{80} \text{ production} \\
&+ \alpha_{5b} T_8 \frac{M_A}{M_A+c_{5b}} && T_8 \text{ production} \\
&+ \alpha_{5c} M_I && M_I \text{ production} \\
&- \nu_{I_\gamma} I_\gamma && \text{Natural decay} \\
\\
\frac{dI_{12}}{dt} &= && \text{INTERLEUKIN-12 } I_{12} \\
&+ s_{12} \frac{BE+wBI}{BE+wBI+c_{230}} && \text{Dendritic cells production} \\
&+ \alpha_{23} M_R \frac{BE+wBI}{BE+wBI+c_{23}} && M_R \text{ production} \\
&+ \alpha_8 M_A \frac{s}{s+I_{10}} && M_A \text{ production} \\
&- \nu_{I_{12}} I_{12} && \text{Natural decay} \\
\\
\frac{dI_{10}}{dt} &= && \text{INTERLEUKIN-10 } I_{10} \\
&+ \delta_7 M_I \frac{s_6}{I_{10}+f_6 I_\gamma+s_6} && M_I \text{ production} \\
&+ \alpha_{16} T_{h1} && T_{h1} \text{ production} \\
&+ \alpha_{17} T_{h2} && T_{h2} \text{ production} \\
&+ \alpha_{18} \frac{T_C+T_8}{2m} && \text{CD8+ T cells production} \\
&- \nu_{I_{10}} I_{10} && \text{Natural decay} \\
\\
\frac{dI_4}{dt} &= && \text{INTERLEUKIN-4 } I_4 \\
&+ \alpha_{11} T_0 && T_0 \text{ production} \\
&+ \alpha_{12} T_{h2} && T_2 \text{ production} \\
&- \nu_{I_4} I_4 && \text{Natural decay} \\
\\
\frac{dF_\alpha}{dt} &= && \text{TUMOR NECROSIS FACTOR-}\alpha \ F_\alpha \\
&+ \alpha_{30} M_I && M_I \text{ production} \\
&+ \alpha_{31} M_A \frac{I_\gamma+\beta_2(BE+wBI)}{I_\gamma+\beta_2(BE+wBI)+f_1 I_4+s_{10}} && M_A \text{ production} \\
&+ \alpha_{32} T_{h1} && T_{h1} \text{ production} \\
&+ \alpha_{33} \frac{T_C+T_8}{2m} && \text{CD8+ T cells production} \\
&- \nu_{F_\alpha} F_\alpha && \text{Natural decay}
\end{aligned}$$

## S2 Derivation of Equations for the Immune Memory Generation and Maintenance

For the dynamics of the circulating memory T cells compartment ( $T^{CM}$ ), we refer to a well established mathematical model of memory generation [2]. This model assumes that an initial amount of memory T cells is generated at the site of primary infection during the contraction phase of the immune response. This amount is slowly diluted during the lifetime of the individual as a consequence of several factors, including the reduction of thymic input of naive T cells and the competition of memory T cells specific for different antigens within the immune memory pool [2]. These dynamics are very complex (reviewed in [3, 4, 5]) and their modeling goes beyond the scope of this work. Therefore we assume the following equation for  $T^{CM}$ :

$$T_i^{CM}(t) = k_i T_i^{peak} e^{-d(t-t_1)} \quad (1)$$

where  $i = h1, C$  distinguishes CD4+ from CD8+ T cells,  $T^{peak}$  is the peak number of effector T cells during the acute phase of primary infection,  $k_i$  is the fraction of effector T cells which are initially transformed to circulating memory T cell and  $d$  is the rate at which the pool of circulating memory T cells wanes in time due to dilution, assumed constant and equal for both CD4+ and CD8+ T cells.

Dynamics of resident memory T cells can be modeled in terms of a balance between the natural death of T cells and the antigen-independent recruitment of T cells from the circulating memory compartment [6]:

$$\frac{dT_i^{RM}}{dt} = sr_i^{RM}T_i^{CM}(t) - \mu_i^{RM}T_i^{RM}(t)$$

Given that changes in the value of  $T_i^{CM}(t)$  occur in the time scale of years or decades, whereas the dynamics of recruitment and death of  $T_i^{RM}$  are in the time scale of days [6], we can approximate  $T_i^{CM}(t)$  as constant in time. Therefore, at equilibrium we will have:

$$T_i^{RM} = \frac{sr_i^{RM}}{\mu_i^{RM}}T_i^{CM}(t) = h_i^{RM}T_i^{CM}(t) \quad (2)$$

In other words, the amount of resident memory T cells at any time is approximated as a proportion  $h_i^{RM}$  of the concentration of circulating memory T cells and therefore this number wanes in time with the same rate  $d$  as the circulating memory compartment.

### S3 Estimation of Parameter Values and Ranges

Most of the model parameters used throughout this work were estimated in previous published papers [7, 8, 9, 1] and are reported in Table S3.

In order to estimate the 8 parameter values and ranges for the additional equations reported in the previous section, human data from published studies on TB-specific memory lymphocytes are used where possible.

#### Estimation of $k_i$

Using Equation 1,  $k_i$  can be estimated for  $t = t_1$  as

$$k_i = \frac{T_i^{CM}(t_1)}{T_i^{peak}}$$

Experimental studies [16] found about 20 (range: 5 to 250) central memory CD4+ T cells every  $10^6$  Peripheral Blood Mononuclear Cells (PBMC) in the blood of TB patients 6 months after successful treatment. In another study [17] about 300 (range: 200 to 700) central memory CD8+ T cells every  $10^6$  PBMC were detected in the blood of TB patients 4 months after treatment. We indicate these quantities as  $f_4^{CM}$  and  $f_8^{CM}$  respectively. Assuming that the peak of the acute phase of the immune response had been reached by the time at which  $f_i^{CM}$  were measured, we can obtain the concentration  $T_i^{CM}(t_1)$  of memory T cells in the blood by simple multiplication of  $f_i^{CM}$  by the normal lymphocyte concentration in the blood [18], indicated with  $[PBMC]$ . Range and average values for  $T_i^{peak}$  were estimated by simulating a primary infection with 1,000 different parameter sets, chosen by Latin Hypercube Sampling [19] using uniform distributions within their range of variability.

Table S2 summarizes the process of estimation for  $k_i$ .

### Estimation of $h_{RMi}$

$h_i^{RM}$  can be estimated from Equation 2 given measurements on resident memory T cells and estimates of circulating memory T cells (as already provided in Table S2) at  $t = t_1$ . In an experimental study on individuals with LTBI (ascertained by reactivity to Tuberculin Skin Test) [20], about 750,000 CD4+ and 350,000 CD8+ were found on average in the broncho-alveolar lavage (BAL) fluid of patients (volume  $V_{BAL} = 30\text{cc}$ ); 7.4 to 14% of CD4+ (55,000 to 105,000) and about 0.8% of CD8+ (3,000) expressed an effector memory phenotype (production of IFN- $\gamma$  and other inflammatory cytokines) after 2 days from a new intranasal challenge with Protein Purified Derivative (PPD) proteins. Therefore, these cells can be considered resident memory T cells: we term the corresponding quantities  $t_{h1}^{RM}(t_1)$  and  $t_C^{RM}(t_1)$  respectively. Since the site of infection considered in our model is a cube of alveolar parenchyma of size  $V_{site} = 2\text{x}2\text{x}2\text{mm} = 8 \cdot 10^{-3} \text{ cc}$ , we can estimate the number  $T_i^{RM}(t_1)$  of initial resident memory T cells at the site of a secondary infection as:

$$T_i^{RM}(t_1) = t_i^{RM}(t_1) \frac{V_{site}}{V_{BAL}}$$

and  $h_i^{RM}$  as  $\frac{T_i^{RM}(t_1)}{T_i^{CM}(t_1)}$ . These passages are summarized in Table S3.

### Estimation of $\alpha_i^{CM}$

The products  $\alpha_i^{CM} T_i^{CM}$  represent the macrophage-dependent recruitment rate of circulating memory T cells, in analogy to parameters  $\alpha_{3a}$  and  $\alpha_{3ac}$  in the terms describing the macrophage-dependent recruitment of effector T cells in the reference model [1]. We assume that the recruitment of memory T cells from the circulating compartment can be  $\kappa$  times that of the macrophage-dependent term, with  $\kappa$  broadly chosen between 0.1 and 100. Table S4 reports a summary of the estimation process for the ranges of these parameters.

### Estimation of $\omega$ and $d$

$\omega$  is the rate of the exponential decay of CD4+ T cell recruitment occurring due to immunosenescence, while  $d$  is the rate at which memory T cells decay due to mechanisms of immune memory dilution [2]. Since we could not find any data to estimate these parameters, we choose a broad range of possible values in order to include all possible ranges of behavior. Values for both rates were chosen between 0.01 and 0.1 years $^{-1}$ , in such a way that a host may lose 50% of his initial capacity (pool of circulating memory T cells for  $d$ , and CD4+ T cells recruitment rates for  $\omega$ ) in about 7 to 70 years. These numbers take as an approximate reference the time to equilibrium of a primary TB infection (up to 5 years) and the maximal lifetime of an individual (about 100 years). We choose for both rates a baseline value of 0.05 years $^{-1}$ . This corresponds to a half-life of about 15 years, which is a good reference for both  $d$  (corresponding to the estimated duration of memory protection from Bacillus Calmette Guerin (BCG) vaccination [21]) and  $\omega$  (age at which, according to [22], the risk of primary active disease is intermediate between children of age  $\leq 10$  years and adults  $\geq 20$  years).

## S4 Endogenous reactivation

The immune response model with aging is able to reproduce endogenous reactivation in a broad region of the parameter space. Figure S2 displays the final outcome of infection for several different values of three model parameters: the rate of cytotoxic killing by activated CD8+ T cells,  $k_{52}$ , which selects the panel in Figure S2; the initial value of the TNF- $\alpha$  dependent recruitment rate of CD4+ cells,  $Sr_{3b}^0$  (x-axis); and the aging parameter  $\omega$  (y-axis). These parameters were selected because of their importance on model

outcome after a preliminary sensitivity analysis [1]. The outcome can be one of four possible types: a) active disease, displayed in dark red; b) LTBI followed by endogenous reactivation at some point of the host's life (orange); c) LTBI without reactivation (yellow); d) clearance of primary infection (turquoise).

## References

1. Sud D, Bigbee C, Flynn JAL, Kirschner DE (2006) Contribution of CD8 T Cells to control of Mycobacterium tuberculosis infection. *The Journal of Immunology* 176: 4296–4314.
2. Antia R, Pilyugin SS, Ahmed R (1998) Models of immune memory: On the role of cross-reactive stimulation, competition, and homeostasis in maintaining immune memory. *PNAS* 95: 14926–14931.
3. Nikolich-Zugich J (2008) Ageing and life-long maintenance of T-cell subsets in the face of latent persistent infections. *Nature Reviews Immunology* 8: 512–522.
4. Miller RA (2005) T cells in aging mice: genetic, developmental, and biochemical analysis. *Immunological Reviews* 205: 94–103.
5. Buchholz VR, Neuenhahn M, Busch DH (2011) CD8+ T cell differentiation in the aging immune system: until the last clone standing. *Current Opinion in Immunology* 23: 1–6.
6. Ely KH, Cookenham T, Roberts AD, Woodland DL (2006) Memory T Cell Populations in the Lung Airways Are Maintained by Continual Recruitment. *The Journal of Immunology* 176: 537–543.
7. Wigginton JE, Kirschner DE (2001) A Model to Predict Cell-Mediated Immune Regulatory Mechanisms During Human Infection with Mycobacterium tuberculosis. *The Journal of Immunology* 166: 1951–1967.
8. Marino S, Pawar S, Fuller CL, Reinhart TA, Flynn JL, et al. (2004) Dendritic Cell Trafficking and Antigen Presentation in the Human Immune Response to Mycobacterium tuberculosis. *The Journal of Immunology* 173: 494–506.
9. Chang ST, Linderman JJ, Kirschner DE (2005) Multiple mechanisms allow Mycobacterium tuberculosis to continuously inhibit MHC class II-mediated antigen presentation by macrophages. *PNAS* 102: 4530–4535.
10. Gilbertson B, Zhong J, Cheers C (1999) Anergy, IFN- $\gamma$  production, and apoptosis in terminal infection of mice with Mycobacterium avium. *J Immunol* 163: 2073–2080.
11. Tsukaguchi K, de Lange B, Boom WH (1999) Differential regulation of IFN- $\gamma$ , TNF- $\alpha$ , and IL-10 production by CD4(+)  $\alpha\beta$  TCR+ T cells and V $\delta$ 2(+)  $\gamma\delta$  T cells in response to monocytes infected with Mycobacterium tuberculosis-H37Ra. *Cell Immunol* 194: 12–20.
12. Oddo M, Renno T, Attinger A, Bakker T, MacDonald HR, et al. (1998) Fas ligand-induced apoptosis of infected human macrophages reduces the viability of intracellular Mycobacterium tuberculosis. *J Immunol* 160: 5448–5454.
13. Rojas M, Olivier M, Gros P, Barrera LF, Garcia LF (1999) TNF- $\alpha$  and IL-10 modulate the induction of apoptosis by virulent Mycobacterium tuberculosis in murine macrophages. *J Immunol* 162: 6122–6131.
14. Li L, Sad S, Kagi D, Mosmann TR (1997) CD8Tc1 and Tc2 cells secrete distinct cytokine patterns in vitro and in vivo but induce similar inflammatory reactions. *J Immunol* 158: 4152–4161.

15. D'Amico G, Frascaroli G, Bianchi G, Transidico P, Doni A, et al. (2000) Uncoupling of inflammatory chemokine receptors by IL-10: generation of functional decoys. *Nat Immunol* 1: 387–391.
16. Millington KA, Innes JA, Hackforth S, Hinks TSC, Deeks JJ, et al. (2007) Dynamic Relationship between IFN-gamma and IL-2 Profile of Mycobacterium tuberculosis-Specific T Cells and Antigen Load. *The Journal of Immunology* 178: 5217–5226.
17. Caccamo N, Guggino G, Meraviglia S, Gelsomino G, Di Carlo P, et al. (2009) Analysis of Mycobacterium tuberculosis-Specific CD8 T Cells in Patients with Active Tuberculosis and in Individuals with Latent Infection. *PLoS ONE* 4: e5528.
18. McClatchey KD (2001) *Clinical laboratory medicine*. Lippincott Williams & Wilkins.
19. Marino S, Hogue IB, Ray CJ, Kirschner DE (2008) A Methodology For Performing Global Uncertainty and Sensitivity Analysis in Systems Biology. *Journal of Theoretical Biology* 254: 178–196.
20. Walrath J, Zukowski L, Krywiak A, Silver RF (2005) Resident Th1-Like Effector Memory Cells in Pulmonary Recall Responses to Mycobacterium tuberculosis. *Am J Respir Cell Mol Biol* 33: 48–55.
21. Styblo K, Meijer J (1976) Impact of BCG vaccination programmes in children and young adults on the tuberculosis problem. *Tubercle*.
22. Vynnycky E, Fine PEM (1997) The natural history of tuberculosis: the implications of age-dependent risks of disease and the role of reinfection. *Epidemiology and Infection* 119: 183–201.



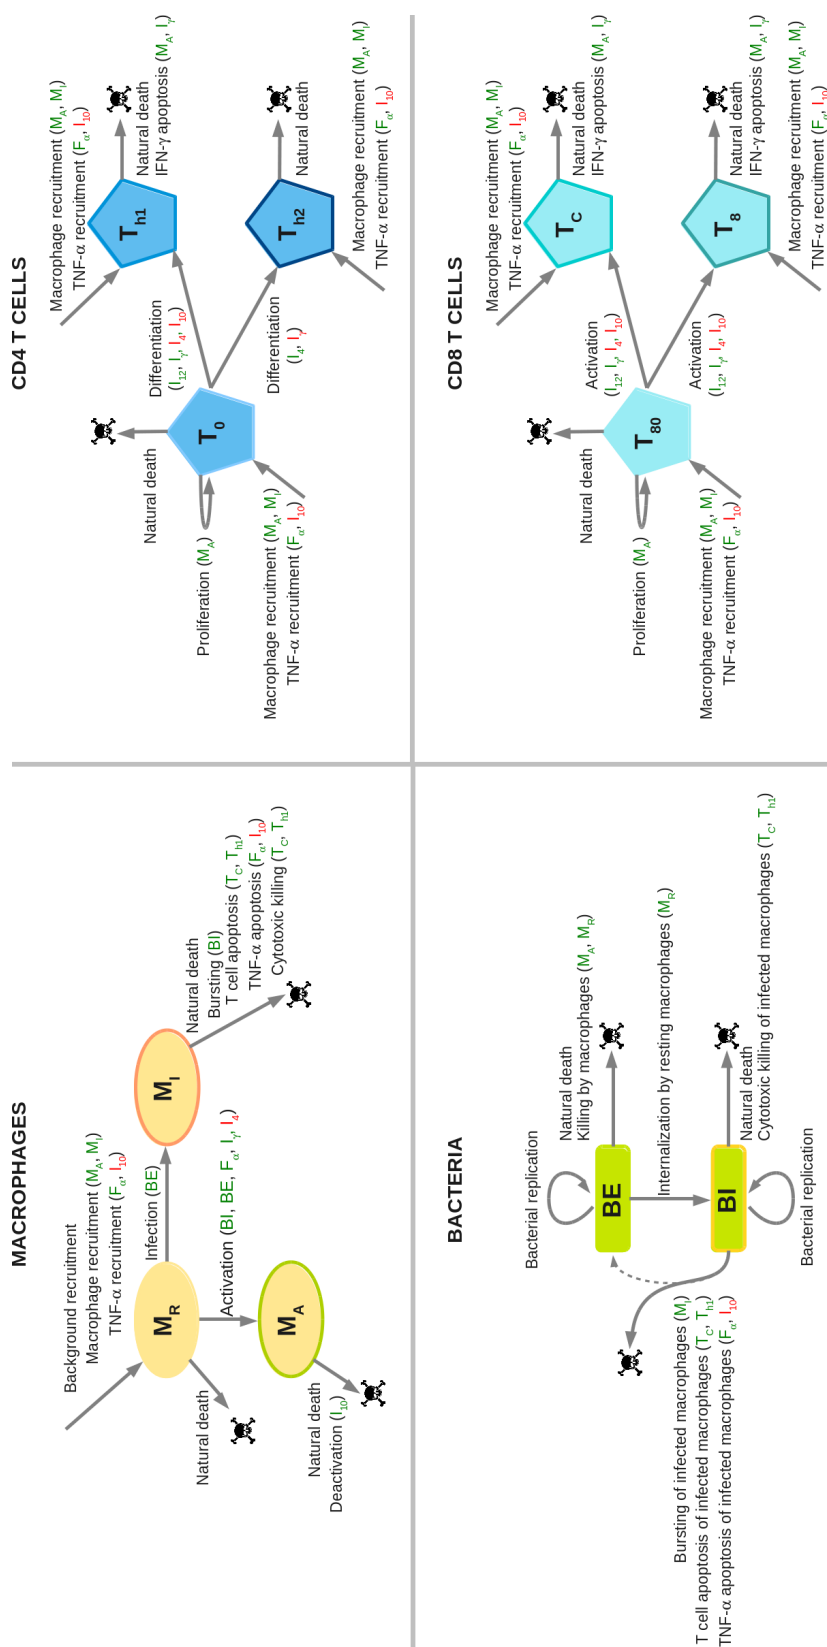

Figure S1: **Graphical summary of the main interactions of the immune response to Mtb.** Each arrow represents a change of state for each cellular population; text alongside arrows describes the terms contributing to each change of state; variables listed in parentheses after each term description represent cells and cytokines enhancing (green), or inhibiting (red) the given mechanism.

Table S1: Parameter ranges and baseline values for model parameters.

| Parameter name                                                | Symbol        | Ref. | Min                 | Base                 | Max                  | Unit       |
|---------------------------------------------------------------|---------------|------|---------------------|----------------------|----------------------|------------|
| $M_R$ recruitment rate                                        | $Sr_m$        | [7]  | 600                 | 650                  | 700                  | $M_R$ /day |
| Contribution of $BI$ to $M_R$ activation                      | $w$           | [7]  | 0.01                | 0.1                  | 0.5                  | -          |
| Contribution of $M_I$ to $M_R$ recruitment                    | $w_2$         | [1]  | 0.0005              | 0.05                 | 0.5                  | -          |
| Ratio adjustment $I_{10}/F_\alpha$ on $M_R$ recruitment       | $f_8$         | [10] | 1                   | 60                   | 100                  | -          |
| Half saturation of $F_\alpha$ on $M_R$ recruitment            | $s_{4b}$      | [10] | 100                 | 200                  | 556                  | pg/ml      |
| Half saturation of $F_\alpha$ on $T_0$ recruitment            | $s_{4b2}$     | [10] | 100                 | 200                  | 500                  | pg/ml      |
| Half saturation of $I_{10}$ on $M_A$ deactivation             | $s_8$         | [7]  | 100                 | 1000                 | 2000                 | pg/ml      |
| Half saturation of $BE$ on $M_R$ infection                    | $c_9$         | [7]  | $10^5$              | $5 \cdot 10^6$       | $3 \cdot 10^7$       | pg/ml      |
| Adjustment $I_4/I_\gamma$                                     | $f_1$         | [7]  | 2.9                 | 205                  | 410                  | -          |
| Scaling factor of $F_\alpha$ for $M_R$ activation             | $\beta$       | [1]  | 100                 | 1000                 | $10^5$               | 1/pg       |
| $M_R$ death rate                                              | $\nu_{MR}$    | [7]  | 0.0033              | 0.0033               | 0.0033               | 1/day      |
| Carrying capacity of $M_I$                                    | $N$           | [7]  | 40                  | 75                   | 100                  | -          |
| Half saturation of $T_{h1}/M_I$ ratio on $M_I$ apoptosis      | $c_4$         | [7]  | 1                   | 40                   | 60                   | -          |
| Cytotoxic killing of $M_I$                                    | $k_{52}$      | [1]  | 0.07                | 0.2                  | 1                    | 1/day      |
| Half saturation of $T_C$ on $M_I$ killing                     | $c_{52}$      | [1]  | 10                  | 20                   | 100                  | -          |
| $M_I$ death rate                                              | $\nu_{MI}$    | [7]  | 0.0011              | 0.0011               | 0.0011               | 1/day      |
| Macrophage recruitment of $T_0$                               | $\alpha_{1a}$ | [11] | 0.001               | 0.003                | 0.01                 | 1/day      |
| Max growth rate of $T_0$                                      | $\alpha_2$    | [7]  | 0.01                | 2                    | 2.8                  | 1/day      |
| Max $T_0$ to $T_{h1}$ rate                                    | $k_6$         | [7]  | 0.005               | 0.005                | 0.005                | ml/(pg da  |
| Max $T_0$ to $T_{h2}$ rate                                    | $k_7$         | [7]  | 0.02                | 0.03                 | 0.07                 | ml/(pg da  |
| Half saturation $I_4$                                         | $s_2$         | [7]  | 1                   | 1.5                  | 2                    | pg/ml      |
| Percentage overlap between $T_C$ and $T_8$                    | $m$           | [1]  | 0.5                 | 0.7                  | 1                    | -          |
| $F_\alpha$ dependent recruitment of $T_{h1}$                  | $Sr_{3b}^0$   | [11] | $10^4$              | $5 \cdot 10^4$       | $10^5$               | 1/day      |
| $F_\alpha$ dependent recruitment of $T_{h2}$                  | $Sr_{3b2}$    | [11] | 1000                | $10^5$               | $10^5$               | 1/day      |
| Half saturation $I_\gamma$ on $T_{h1}$ apoptosis              | $c$           | [12] | 1067                | 1120                 | 1173                 | pg/ml      |
| $T_{h2}$ death rate                                           | $\nu_{T2}$    | [7]  | 0.3                 | 0.3                  | 0.3                  | 1/day      |
| $F_\alpha$ dependent recruitment of $T_C$ and $T_8$           | $Sr_{3bc}$    | [11] | $10^4$              | $5 \cdot 10^4$       | $8 \cdot 10^4$       | 1/day      |
| Half saturation $I_\gamma$ on $T_C$ and $T_8$ apoptosis       | $c_c$         | [12] | 530                 | 550                  | 600                  | pg/ml      |
| $I_\gamma$ production by dendritic cells (DCs)                | $s_g$         | [7]  | 1                   | 500                  | 1000                 | pg/(ml da  |
| Half saturation of $I_{12}$ on $I_\gamma$ production by DCs   | $s_7$         | [7]  | 5                   | 60                   | 100                  | pg/ml      |
| Half saturation of $M_A$ on $I_\gamma$ production by $T_{h1}$ | $c_{5a}$      | [1]  | 5000                | 8000                 | 20000                | 1/ml       |
| $I_\gamma$ production by $M_I$                                | $\alpha_{5c}$ | [1]  | 0.02                | 0.05                 | 0.066                | pg/ml      |
| $I_\gamma$ production by $T_0$                                | $\alpha_7$    | [7]  | 0.02                | 0.05                 | 0.066                | pg/ml      |
| Half saturation of $I_{12}$ on $I_\gamma$                     | $s_4$         | [7]  | 50                  | 75                   | 100                  | pg/ml      |
| $I_\gamma$ decay rate                                         | $\nu_{IG}$    | [7]  | 2.16                | 20                   | 33.27                | 1/day      |
| Half saturation of Mtb on $I_{12}$ production by $M_R$        | $c_{23}$      | [1]  | 1000                | $10^5$               | $5 \cdot 10^6$       | 1/ml       |
| Dendritic cell production of $I_{12}$                         | $s_{12}$      | [1]  | 200                 | 500                  | 1000                 | pg/(ml da  |
| $I_{12}$ decay rate                                           | $\nu_{I12}$   | [7]  | 1.1                 | 1.1                  | 1.1                  | 1/day      |
| $I_{12}$ production by $M_A$                                  | $\alpha_8$    | [7]  | 0.0012              | 0.005                | 0.012                | pg/day     |
| Adjustment $I_\gamma$ on $I_{10}$                             | $f_6$         | [7]  | 0.025               | 0.035                | 0.053                | -          |
| $I_{10}$ production by $T_{h1}$                               | $\alpha_{16}$ | [7]  | $2 \cdot 10^{-4}$   | $8 \cdot 10^{-4}$    | $10^{-3}$            | pg/day     |
| $I_{10}$ production by $T_C$ and $T_8$                        | $\alpha_{18}$ | [1]  | $2 \cdot 10^{-4}$   | $4 \cdot 10^{-3}$    | $6 \cdot 10^{-2}$    | pg/day     |
| $I_{10}$ decay rate                                           | $\nu_{I10}$   | [7]  | 3.7                 | 5.5                  | 7.23                 | 1/day      |
| $I_4$ production by $T_{h2}$                                  | $\alpha_{12}$ | [7]  | 0.001               | 0.0065               | 0.00912              | pg/day     |
| $F_\alpha$ production by $M_I$                                | $\alpha_{30}$ | [1]  | 0.0012              | 0.012                | 0.02                 | pg/(ml da  |
| Scaling factor of Mtb for $F_\alpha$ production by $M_A$      | $\beta_2$     | [1]  | $10^{-3}$           | $10^{-3}$            | $10^{-3}$            | 1/pg       |
| $F_\alpha$ production by $T_{h1}$                             | $\alpha_{32}$ | [13] | $10^{-5}$           | $10^{-4}$            | $5 \cdot 10^{-3}$    | pg/(ml da  |
| Half saturation of Mtb on $F_\alpha$ production by $T_{h1}$   | $c_T$         | [1]  | 1000                | 5000                 | 10000                | -          |
| $BI$ growth rate                                              | $\alpha_{19}$ | [7]  | 0.1                 | 0.35                 | 1                    | 1/day      |
| Fraction $BI$ released by T cell apoptosis of $M_I$           | $N_{fracc}$   | [7]  | 0.05                | 0.1                  | 0.2                  | -          |
| $BE$ killing by $M_A$                                         | $k_{15}$      | [7]  | $1.3 \cdot 10^{-9}$ | $1.25 \cdot 10^{-6}$ | $1.25 \cdot 10^{-5}$ | ml/day     |
| $BI$ death rate                                               | $n_I$         | [1]  | $5 \cdot 10^{-6}$   | $5 \cdot 10^{-3}$    | $5 \cdot 10^{-3}$    | 1/day      |
| Macrophage recruitment of $M_R$                               | $\alpha_{4a}$ | [1]  | 0.01                | 0.03                 | 0.05                 | 1/day      |
| Max contribution of $T_{h1}$ to $M_I$ apoptosis               | $w_3$         | [1]  | 0.1                 | 0.4                  | 0.8                  | -          |
| $F_\alpha$ dependent recruitment of $M_R$                     | $Sr_{4b}$     | [1]  | $2 \cdot 10^3$      | $2 \cdot 10^5$       | $5 \cdot 10^5$       | 1/day      |
| Ratio adjustment $F_\alpha/I_{10}$                            | $f_9$         | [1]  | 1                   | 60                   | 100                  | -          |

| Parameter name                                                                | Symbol          | Ref. | Min                 | Base              | Max                 | Unit      |
|-------------------------------------------------------------------------------|-----------------|------|---------------------|-------------------|---------------------|-----------|
| Half saturation of $F_\alpha$ dependent $T_{h1}$ recruitment                  | $s_{4b1}$       | [1]  | 160                 | 168               | 172                 | pg/ml     |
| $M_A$ deactivation by $I_{10}$                                                | $k_4$           | [7]  | 0.01                | 0.36              | 0.40                | 1/day     |
| $M_R$ infection rate                                                          | $k_2$           | [7]  | 0.01                | 0.05              | 5                   | 1/day     |
| $M_R$ activation rate                                                         | $k_3$           | [7]  | 0.001               | 0.01              | 0.1                 | 1/day     |
| Half saturation of $I_\gamma$ dependent $M_R$ activation                      | $s_1$           | [7]  | 0.1                 | 10                | 30                  | pg/ml     |
| Half saturation of $BE$ and $BI$ on $M_R$ activation                          | $c_8$           | [7]  | $10^4$              | $10^5$            | $2.2 \cdot 10^5$    | 1/ml      |
| Max rate of $M_I$ bursting                                                    | $k_{17}$        | [7]  | $8 \cdot 10^{-5}$   | 0.05              | 0.08                | 1/day     |
| T cell induced apoptosis of $M_I$                                             | $k_{14a}$       | [1]  | 0.03                | 0.05              | 0.08                | 1/day     |
| $F_\alpha$ induced apoptosis of $M_I$                                         | $k_{14b}$       | [1]  | 0.15                | 0.5               | 1.00                | 1/day     |
| Max contribution of $T_{h1}$ to cytotoxic killing                             | $w_1$           | [1]  | 0.001               | 0.5               | 1.00                | -         |
| Half saturation of $T_{h1}$ on cytotoxic killing                              | $c_{T1}$        | [1]  | 1                   | 50                | 10000               | -         |
| $M_A$ death rate                                                              | $\nu_{MA}$      | [7]  | 0.07                | 0.07              | 0.07                | 1/day     |
| $F/\alpha$ dependent $T_0$ recruitment                                        | $Sr_{1b}$       | [11] | $10^4$              | $10^5$            | $10^6$              | 1/day     |
| Half saturation of $M_A$ on $I_\gamma$ production by $T_{h1}$                 | $c_{15}$        | [7]  | $10^4$              | $5 \cdot 10^4$    | $10^5$              | -         |
| Effect of $I_{10}$ on $I_\gamma$ induced differentiation of $T_0$ to $T_{h1}$ | $f_7$           | [1]  | 1                   | 5                 | 5.00                | -         |
| Adjustment $I_\gamma/I_4$                                                     | $f_2$           | [7]  | 1                   | 1                 | 1                   | -         |
| $T_0$ death rate                                                              | $\nu_{T0}$      | [7]  | 0.0111              | 0.2               | 0.333               | 1/day     |
| Macrophage recruitment of $T_{h1}$                                            | $\alpha_{3a}^0$ | [11] | 0.003               | 0.003             | 0.003               | 1/day     |
| Macrophage recruitment of $T_{h2}$                                            | $\alpha_{3a2}$  | [1]  | $10^{-3}$           | $10^{-3}$         | $10^{-3}$           | 1/day     |
| $I_\gamma$ induced apoptosis of $T_{h1}$                                      | $\nu_{Tg}$      | [12] | $10^{-5}$           | $10^{-4}$         | $10^{-3}$           | 1/day     |
| $T_{h1}$ death rate                                                           | $\nu_{T1}$      | [7]  | 0.3                 | 0.3               | 0.30                | 1/day     |
| Macrophage recruitment of $T_C$ and $T_8$                                     | $\alpha_{3ac}$  | [11] | 0.001               | 0.0077            | 0.0145              | 1/day     |
| $I_\gamma$ induced apoptosis of $T_c$ and $T_8$                               | $\nu_{TCg}$     | [12] | $10^{-5}$           | $10^{-4}$         | $10^{-3}$           | 1/day     |
| $T_C$ death rate                                                              | $\nu_{TC}$      | [1]  | 0.3                 | 0.3               | 0.3                 | 1/day     |
| Half saturation of Mtb on $I_\gamma$ production by DCs                        | $c_{10}$        | [7]  | 100                 | 5000              | $10^5$              | 1/ml      |
| $I_\gamma$ production by $T_{h1}$                                             | $\alpha_{5a}$   | [1]  | 0.01                | 0.5               | 1                   | pg/day    |
| $I_\gamma$ production by $T_8$                                                | $\alpha_{5b}$   | [1]  | 0.01                | 0.5               | 1                   | pg/day    |
| Half saturation of $M_A$ on $I_\gamma$ production by $T_8$                    | $c_{5b}$        | [1]  | $10^4$              | $5 \cdot 10^4$    | $10^5$              | 1/ml      |
| Adjustment of $I_{10}/I_{12}$ on $I_\gamma$                                   | $f_4$           | [7]  | 0.76                | 1.8               | 3.20                | -         |
| Half saturation of $M_A$ on $I_\gamma$ production by $T_8$                    | $c_{5b}$        | [1]  | $10^4$              | $5 \cdot 10^4$    | $10^5$              | 1/ml      |
| $I_{12}$ production by $M_R$                                                  | $\alpha_{23}$   | [1]  | $10^{-4}$           | $10^{-3}$         | 0.1                 | pg/ml     |
| $I_{12}$ production by $M_A$                                                  | $\alpha_8$      | [7]  | $10^{-4}$           | 0.003             | 0.01                | pg/day    |
| Half saturation of Mtb on $I_{12}$ production by DCs                          | $c_{230}$       | [1]  | 1000                | $10^4$            | $10^5$              | 1/ml      |
| $I_{10}$ effect on $I_{12}$ production by $M_A$                               | $s$             | [1]  | 1                   | 50                | 100                 | pg/ml     |
| Half saturation of $I_{10}$ self-inhibition in $M_A$                          | $s_6$           | [7]  | 51                  | 56                | 60                  | pg/ml     |
| $I_{10}$ production by $M_A$                                                  | $\delta_7$      | [1]  | $10^{-5}$           | $10^{-2}$         | 0.1                 | pg/ml     |
| $I_{10}$ production by $T_{h2}$                                               | $\alpha_{17}$   | [7]  | $2 \cdot 10^{-4}$   | $6 \cdot 10^{-3}$ | $6 \cdot 10^{-3}$   | pg/day    |
| $I_4$ production by $T_0$                                                     | $\alpha_{11}$   | [7]  | 0.001               | 0.002             | 0.004               | pg/day    |
| $I_4$ decay rate                                                              | $\nu_{I4}$      | [7]  | 2.77                | 2.77              | 2.77                | 1/day     |
| $F_\alpha$ production by $M_A$                                                | $\alpha_{31}$   | [1]  | 0.003               | 0.01              | 0.015               | pg/(ml d) |
| Half saturation of $I_\gamma$ on $F_\alpha$ production by $M_A$               | $s_{10}$        | [1]  | 50                  | 80                | 100                 | pg/ml     |
| $F_\alpha$ production by $T_8$                                                | $\alpha_{33}$   | [14] | $6.4 \cdot 10^{-5}$ | $10^{-4}$         | $1.1 \cdot 10^{-4}$ | pg/(ml d) |
| $F_\alpha$ decay rate                                                         | $\nu_{TNF}$     | [15] | 1.112               | 1.112             | 1.112               | 1/day     |
| $BE$ growth rate                                                              | $\alpha_{20}$   | [7]  | 0.05                | 0.05              | 0.05                | -         |
| Fraction $BI$ released by TNF apoptosis of $M_I$                              | $N_{frac}$      | [1]  | 0.4                 | 0.6               | 0.8                 | -         |
| $BE$ killing by $M_R$                                                         | $k_{18}$        | [7]  | $1.3 \cdot 10^{-9}$ | $2 \cdot 10^{-9}$ | $7 \cdot 10^{-8}$   | ml/day    |

Table S2: Estimation of the immunogenic potentials,  $k_i$ .

| Parameter name                             | Symbol             | Reference                                | Min              | Max            | Mean           | Unit                      |
|--------------------------------------------|--------------------|------------------------------------------|------------------|----------------|----------------|---------------------------|
| Proportion of $T_{h1}^{CM}$ cells in blood | $f_{h1}^{CM}$      | [16]                                     | 5                | 250            | 20             | $\frac{cells}{10^6 PBMC}$ |
| Proportion of $T_C^{CM}$ in blood          | [17]               | $f_C^{CM}$                               | 200              | 700            | 300            | $\frac{cells}{10^6 PBMC}$ |
| Lymphocyte concentration in blood          | [PBMC]             | [18]                                     | $1.5 \cdot 10^6$ | $5 \cdot 10^6$ | $3 \cdot 10^6$ | $\frac{ml}{PBMC}$         |
| Concentration of $T_{h1}^{CM}$ in blood    | $T_{h1}^{CM}(t_1)$ | $f_{h1}^{CM} \cdot [PBMC]$               | 7.5              | 1250           | 60             | $\frac{ml}{cells}$        |
| Concentration of $T_C^{CM}$ in blood       | $T_C^{CM}(t_1)$    | $f_C^{CM} \cdot [PBMC]$                  | 300              | 3500           | 900            | $\frac{ml}{cells}$        |
| Number of peak $T_{h1}$ cells              | $T_{h1}^{peak}$    | [1]                                      | 30               | 20000          | 600            | $cells$                   |
| Number of peak $T_C$ cells                 | $T_C^{peak}$       | [1]                                      | 30               | 15000          | 600            | $cells$                   |
| Immunogenic potential for $T_{h1}^{CM}$    | $k_{h1}$           | $\frac{T_{h1}^{CM}(t_1)}{T_{h1}^{peak}}$ | 0.0625           | 0.25           | 0.1            | $ml^{-1}$                 |
| Immunogenic potential for $T_C^{CM}$       | $k_C$              | $\frac{T_C^{CM}(t_1)}{T_C^{peak}}$       | 0.23             | 10             | 1.5            | $ml^{-1}$                 |

Table S3: Estimation of the turnover rates of resident memory T cells,  $h_i^{RM}$ .

| Parameter name                         | Symbol             | Reference                                   | Min                  | Max                 | Mean                | Unit               |
|----------------------------------------|--------------------|---------------------------------------------|----------------------|---------------------|---------------------|--------------------|
| Volume of BAL                          | $V_{BAL}$          | [20]                                        | -                    | -                   | 30                  | $cc$               |
| Volume of site of infection            | $V_{site}$         | [1]                                         | -                    | -                   | $8 \cdot 10^{-3}$   | $cc$               |
| Initial number of $T_{h1}^{RM}$ in BAL | $t_{h1}^{RM}(t_1)$ | [20]                                        | 55,000               | 105,000             | 80,000              | $cells$            |
| Initial number of $T_C^{RM}$ in BAL    | $t_C^{RM}(t_1)$    | [20]                                        | 3000                 | 3000                | 3000                | $cells$            |
| Initial number of $T_{h1}^{RM}$        | $T_{h1}^{RM}(t_1)$ | $t_{h1}^{RM}(t_1) \frac{V_{site}}{V_{BAL}}$ | 15                   | 28                  | 21                  | $cells$            |
| Initial number of $T_C^{RM}$           | $T_C^{RM}(t_1)$    | $t_C^{RM}(t_1) \frac{V_{site}}{V_{BAL}}$    | 1                    | 1                   | 1                   | $cells$            |
| Concentration of initial $T_{h1}^{CM}$ | $T_{h1}^{CM}(t_1)$ | Table S2                                    | 7.5                  | 1250                | 60                  | $\frac{ml}{cells}$ |
| Concentration of initial $T_C^{CM}$    | $T_C^{CM}(t_1)$    | Table S2                                    | 300                  | 3500                | 900                 | $\frac{ml}{cells}$ |
| Turnover rate of memory CD4+           | $h_{h1}^{RM}$      | $\frac{T_{h1}^{RM}(t_1)}{T_{h1}^{CM}(t_1)}$ | $2.24 \cdot 10^{-2}$ | 2                   | 0.35                | $ml$               |
| Turnover rate of memory CD8+           | $h_C^{RM}$         | $\frac{T_C^{RM}(t_1)}{T_C^{CM}(t_1)}$       | $2.9 \cdot 10^{-4}$  | $3.3 \cdot 10^{-3}$ | $1.1 \cdot 10^{-3}$ | $ml$               |

Table S4: Estimation of the antigen dependent recruitment rates of circulating memory T cells upon secondary infection,  $\alpha_i^{CM}$ .

| Parameter name                              | Symbol             | Reference                                     | Min                 | Max       | Mean                | Unit                    |
|---------------------------------------------|--------------------|-----------------------------------------------|---------------------|-----------|---------------------|-------------------------|
| Arbitrary proportional constant             | $\kappa$           | -                                             | 0.1                 | 100       | 1                   |                         |
| Initial concentration of $T_{h1}^{CM}$      | $T_{h1}^{CM}(t_1)$ | Table S2                                      | 7.5                 | 1250      | 60                  | $\frac{ml}{cells}$      |
| Initial concentration of $T_C^{CM}$         | $T_C^{CM}(t_1)$    | Table S2                                      | 300                 | 3500      | 900                 | $\frac{ml}{cells}$      |
| Rate of $T_{h1}$ recruitment by macrophages | $\alpha_{3a}$      | [1]                                           | 0.003               | 0.003     | 0.003               | $\frac{cells/Mph}{day}$ |
| Rate of $T_C$ recruitment by macrophages    | $\alpha_{3ac}$     | [1]                                           | 0.003               | 0.003     | 0.003               | $\frac{cells/Mph}{day}$ |
| $T_{h1}^{CM}$ recruitment rate              | $\alpha_{h1}^{CM}$ | $\kappa \frac{\alpha_{3a}}{T_{h1}^{CM}(t_1)}$ | $2.4 \cdot 10^{-7}$ | 0.04      | $5 \cdot 10^{-5}$   | $\frac{ml/Mph}{day}$    |
| $T_C^{CM}$                                  | $\alpha_C^{CM}$    | $\kappa \frac{\alpha_{3ac}}{T_C^{CM}(t_1)}$   | $8.6 \cdot 10^{-8}$ | $10^{-3}$ | $3.3 \cdot 10^{-6}$ | $\frac{ml/Mph}{day}$    |

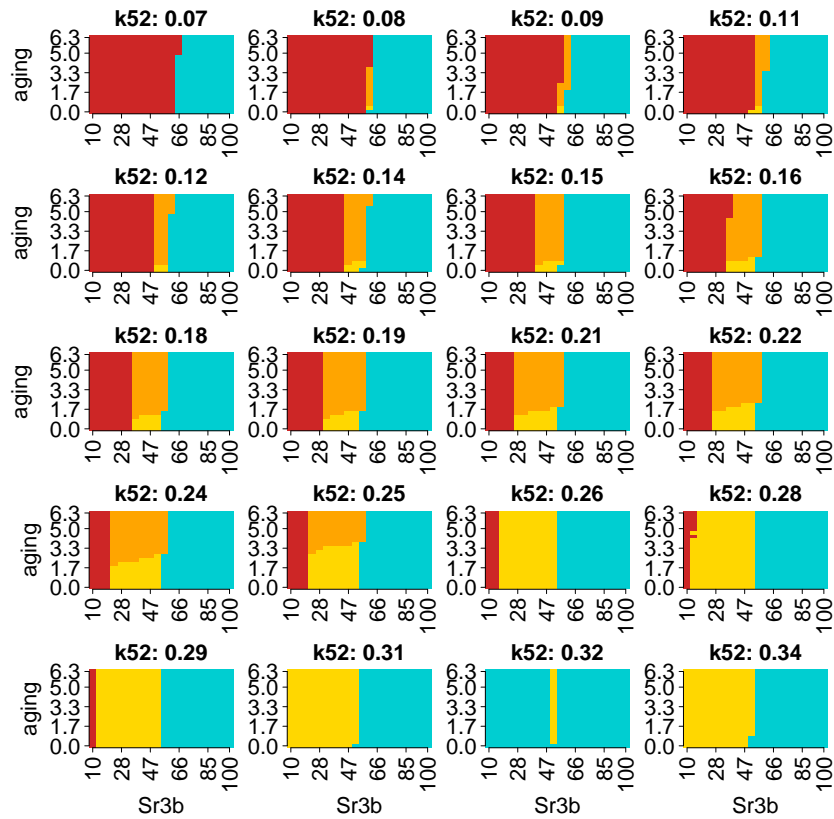

Figure S2: **Parameter regions for reactivation.** All simulations are performed assuming an initial inoculum of  $N = 25$  bacteria, the age at first infection  $t_1 = 0$  for simplicity, and all other model parameters as in Table S3 of this text.
